# Supplementary material for: Effect of Mn content in CuO/MnCeOxcatalysts on CO2hydrogenation for methanol synthesis
Source: Royal Society of Chemistry journal article supplement (doi:10.1039/d3re00022b), 2023-01-01
Supplement: d3re00022b1.pdf [file d3re00022b1.pdf]

## Supporting Information

### Effect of Mn content in CuO/MnCeO<sub>x</sub> catalysts on CO<sub>2</sub> hydrogenation for methanol synthesis

Mengdong Nie <sup>a</sup>, Tuo Guo <sup>b</sup>, Fangyuan Qiang <sup>a</sup>, Man Wu <sup>a</sup>, Yongzhuo Liu <sup>a</sup>, Qingjie  
Guo\* <sup>a, b</sup>, and Yurong He \* <sup>a, b</sup>

<sup>a</sup> College of Chemical Engineering, Qingdao University of Science & Technology,  
Qingdao 266042, China

<sup>b</sup> State Key Laboratory of High-efficiency Coal Utilization and Green Chemical  
Engineering, College of Chemistry and Chemical Engineering, Ningxia University,  
Yinchuan, 750021, China

**\*Corresponding Author:**

\*E-mail: qjguo@qust.edu.cn (Q. Guo) ; hyr@nxu.edu.cn (Y. He)

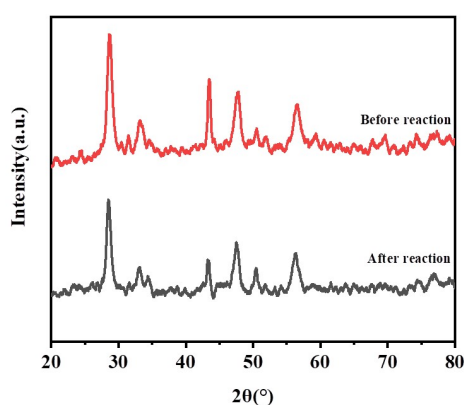

**Fig. S1** Comparison of XRD patterns of CuO/Mn<sub>0.2</sub>CeO<sub>x</sub> catalysts before and after the reaction

The XRD patterns of the CuO/Mn<sub>0.2</sub>CeO<sub>x</sub> catalyst before and after the reaction (Fig. S1) were compared and we found that the structure of the catalyst remained the same before and after the reaction, and no new diffraction peaks were found, which indicates that our prepared CuO/Mn<sub>0.2</sub>CeO<sub>x</sub> catalyst has a certain structural stability.

**Table S1** Comparison of catalytic performance of different copper-based catalysts

| Catalyst                                              | P/<br>bar | T/<br>°C | GHSV<br>(ml/g·h <sup>-1</sup> ) | X <sub>CO2</sub><br>(%) | S <sub>CH3OH</sub> (%) | Y <sub>CH3OH</sub><br>(%) | STY <sub>CH3OH</sub><br>(<br>mg <sub>MeOH</sub> g <sub>cat</sub> <sup>-1</sup> h <sup>-1</sup><br>) |              | Ref |
|-------------------------------------------------------|-----------|----------|---------------------------------|-------------------------|------------------------|---------------------------|-----------------------------------------------------------------------------------------------------|--------------|-----|
|                                                       |           |          |                                 |                         |                        |                           |                                                                                                     |              |     |
| Cu/CeO <sub>2</sub>                                   | 30        | 280      | NA                              | 10.0                    | 73.0                   | 7.30                      | NA                                                                                                  | [1]          |     |
| Cu/ZrO <sub>2</sub>                                   | 30        | 280      | NA                              | 12.4                    | 30.5                   | 3.78                      | NA                                                                                                  | [1]          |     |
| Cu/Ce <sub>0.4</sub> Zr <sub>0.6</sub> O <sub>2</sub> | 30        | 280      | NA                              | 13.2                    | 71.8                   | 9.48                      | NA                                                                                                  | [2]          |     |
| Cu/AlCeO-7                                            | 40        | 240      | 6000                            | 14.8                    | 73.0                   | 10.80                     | 231.5                                                                                               | [3]          |     |
| 1Cu2Ni/CeO <sub>2</sub> -<br>NR                       | 20        | 260      | 6000                            | 15.9                    | 71.6                   | 11.38                     | 244.0                                                                                               | [4]          |     |
| 4.7Cu-TiO <sub>2</sub>                                | 30        | 200      | 4800                            | 9.4                     | 96.1                   | 9.03                      | 154.9                                                                                               | [5]          |     |
| CuO/Mn <sub>0.2</sub> CeO <sub>x</sub>                | 15        | 260      | 6000                            | 14.2                    | 82.3                   | 11.68                     | 250.0                                                                                               | This<br>work |     |

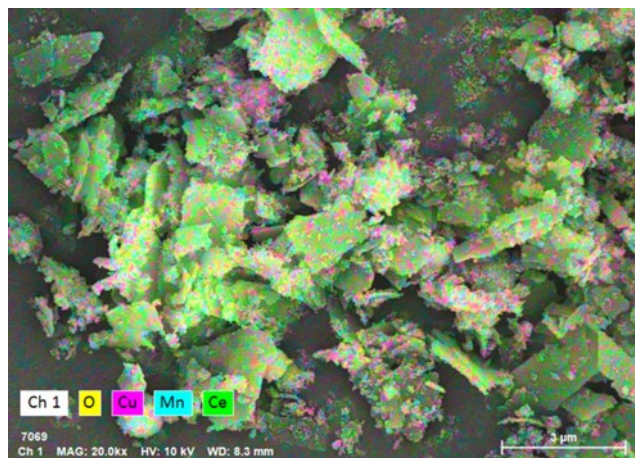

**Fig. S2** Mappings of the  $\text{CuO/Mn}_{0.2}\text{CeO}_x$

**Table S2** Comparison of the catalytic performance of  $\text{CuO/Mn}_{0.2}\text{CeO}_x$  catalysts at different pressures ( $T = 260^\circ\text{C}$ ,  $\text{GHSV} = 6000 \text{ mL/g}\cdot\text{h}^{-1}$ )

| P/bar | $\text{Con}_{\text{CO}_2}(\%)$ | $\text{Con}_{\text{CO}}(\%)$ | $\text{S}_{\text{CH}_3\text{OH}}(\%)$ | $\text{STY}_{\text{CH}_3\text{OH}}$<br>(<br>$\frac{\text{g}_{\text{MeOH}}}{\text{g}_{\text{cat}} \cdot \text{h}} \cdot \text{h}^{-1}$<br>) |
|-------|--------------------------------|------------------------------|---------------------------------------|--------------------------------------------------------------------------------------------------------------------------------------------|
| 10    | 14.052                         | 18.963                       | 80.725                                | 0.243                                                                                                                                      |
| 15    | 14.184                         | 17.766                       | 82.261                                | 0.250                                                                                                                                      |

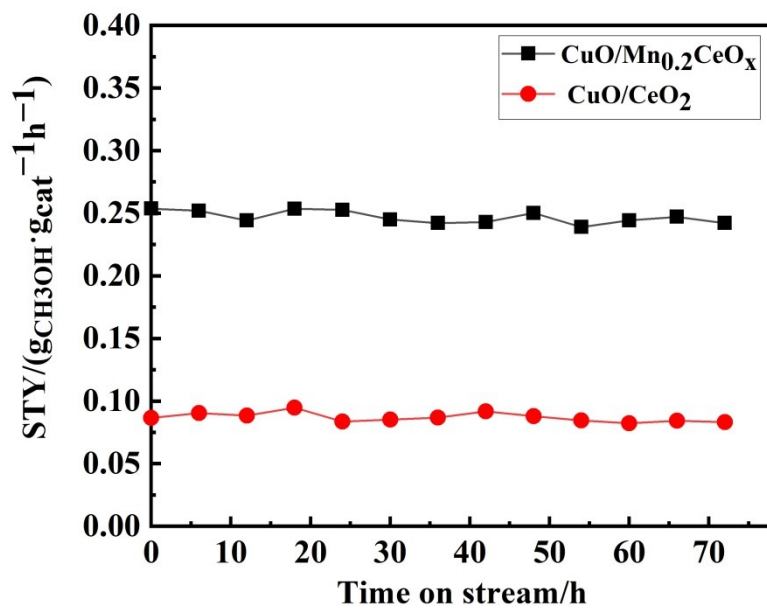

**Fig.S3** Catalytic stability test of CuO/CeO<sub>2</sub> and CuO/Mn<sub>0.2</sub>CeO<sub>x</sub> catalysts (T=260°C, P=15 bar, GHSV=6000 mL/g·h<sup>-1</sup>).

**Reference:**

- [1] W. Wang, Z. Qu, L. Song and Q. Fu, *J. Energy. Chem.*, 2020, **40**, 22-30.
- [2] W. Wang, Z. Qu, L. Song and Q. Fu, *Mol. Catal.*, 2020, **493**, 111105.
- [3] S. Li, Y. Wang, B. Yang and L. Guo, *Appl. Catal. A-Gen.*, 2019, **571**, 51-60.
- [4] Q. Tan, Z. Shi and D. Wu, *Int. J. Energ. Res.*, 2019, **43**, 5392-5404.
- [5] S.K. Sharma, A. Banerjee, B. Paul, M.K. Poddar, T. Sasaki, C. Samanta and R. Bal, *J. CO<sub>2</sub> Util.*, 2021, **50**, 101576.
